# Supplementary material
Source: PubMed Central journal article supplement (PMC7245553)
Supplement: NIHMS1572786-supplement-2.pdf [file NIHMS1572786-supplement-2.pdf]

## Supplementary Information

**Figure S1. Related to Figure 1.** The docking studies of A) 3-methyl transposed indole analog (later prepared as compound **4**) and B) 3-methyl-2-methylamino transposed indole analog (later prepared as compound **11**) to KasA using Autodock Vina (Vers. 1.1.2).

**Figure S2. Related to Tables 1 and 2.** Synthetic route to A) and B) transposed indoles and C) transposed indazoles.

**Figure S3. Related to Tables 1 and 2.** The kill kinetics of indoles A) **9** and B) **10**, and C) JSF-3285 at 10x MIC versus *M. tuberculosis* H37Rv and reduction of intracellular *M. tuberculosis* mc<sup>2</sup>6206 infection in J774.1 cells by indoles D) **9** and E) **10** and F) JSF-3285 with G) INH and H) RIF as controls.

**Figure S4. Related to Figure 2.** Unidentified electron density near the compound **9** binding site.

**Figure S5. Related to Figure 2.** Structural comparison of KasA-DG167 and KasA-**9/10**.

**Figure S6. Related to Tables 1 and 2.** Plot of plasma concentration ( $C_{\text{plasma}}$ ) as a function of time for a single 25 mg/kg oral dose study in mice of A) compound **9**, B) compound **10**, C) DG167, D) compound **5g**, E) compound **12** (JSF-3285), F) compound **13**, G) compound **14**, H) compound **15**, and I) compound **16**.

**Figure S7. Related to Table 2.** Analysis of compound modulation of *M. tuberculosis* mycolic acid biosynthesis by **JSF-3285**.

**Table S1. Related to Table 1.** *M. tuberculosis* MIC and Vero cell CC<sub>50</sub> data for additional transposed indole analogs.

**Table S2. Related to Tables 1 and 2.** Activity of A) select transposed indoles (tabulated MIC values are in  $\mu\text{M}$ ) versus clinical drug-resistant *M. tuberculosis* strains, (Vincent et al., 2012; Wilson et al., 2013), B) JSF-3285 versus select ESKAPE bacteria, and C) JSF-3285 versus clinical drug-resistant *M. tuberculosis* strains.

**Table S3. Related to Tables 1 and 2.** Activity of A) compounds **9** and **10** and JSF-3285 versus DG167-resistant *M. tuberculosis* mutants and B) JSF-3285 versus JSF-3285 spontaneous resistant *M. tuberculosis* mutants.

**Table S4. Related to Figures 2 and 4.** Data collection and refinement statistics for the X-ray crystal structures of KasA with bound compound **9**, compound **10**, or JSF-3285.

**Table S5. Related to Table 1.** Mouse pharmacokinetic profiling of select indole compounds.

**Table S6. Related to Tables 1 and 2.** A) Plasma protein binding (PPB) and plasma stability and B) cytochrome P450 inhibition for compounds **9**, **10**, and **JSF-3285**.

**Table S7. Related to Tables 1 and 2.** Dose escalation and tolerability data for compounds A) **9**, B) **10**, and C) JSF-3285.

**Figure S1. Related to Figure 1.** The docking studies of A) 3-methyl transposed indole analog (later prepared as compound **4**) and B) 3-methyl-2-methylamino transposed indole analog (later prepared as compound **11**) to KasA using Autodock Vina Vers. 1.1.2. Each ligand was prepared for docking experiment by adding hydrogens at pH 7.4 and minimizing the input geometry with the MMFF94 force field using Avogadro (Vers.1.2.0). The rotatable bonds were defined and Gasteiger partial charge was calculated in AutoDock Tools (Vers. 1.5.6). The hydrogen substituent at the C2 of the indole projected out of the pocket and the structure overlayed in green is DG167<sub>A</sub> in the same binding site. The predicted binding mode for this analog retains the key interactions of DG167 with the DG167<sub>A</sub> binding site, while having the 3-methyl moiety mimic interactions of the DG167 1-methyl with Pro201 and Pro206, places the *n*-butylsulfonamide into the hydrophobic channel formed by Ile202, Phe239, and Ile347, and maintains a hydrogen bond between the sulfonamide N-H and Glu-199. In addition, the indole-NH was predicted to be positioned to hydrogen bond with Glu203.

A)

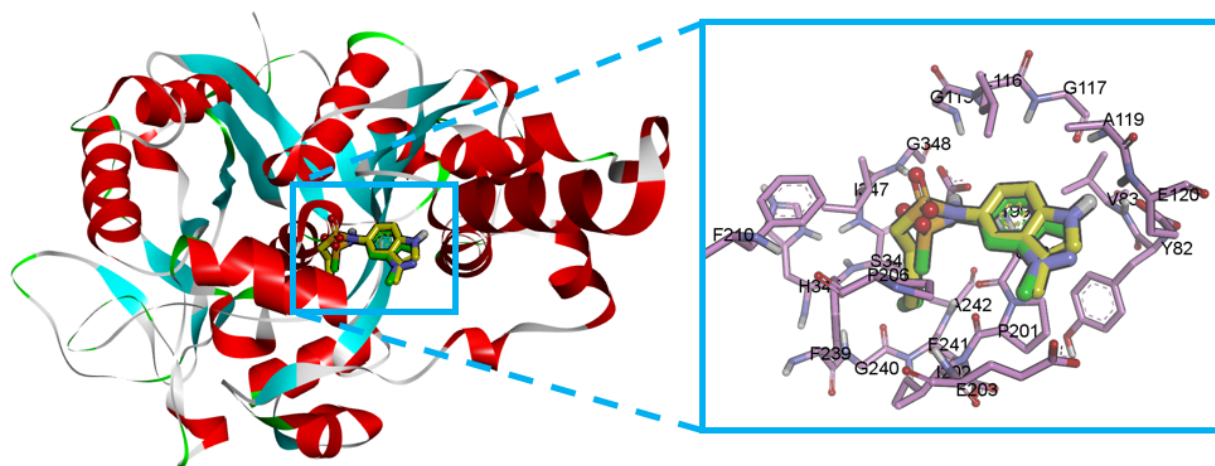

B)

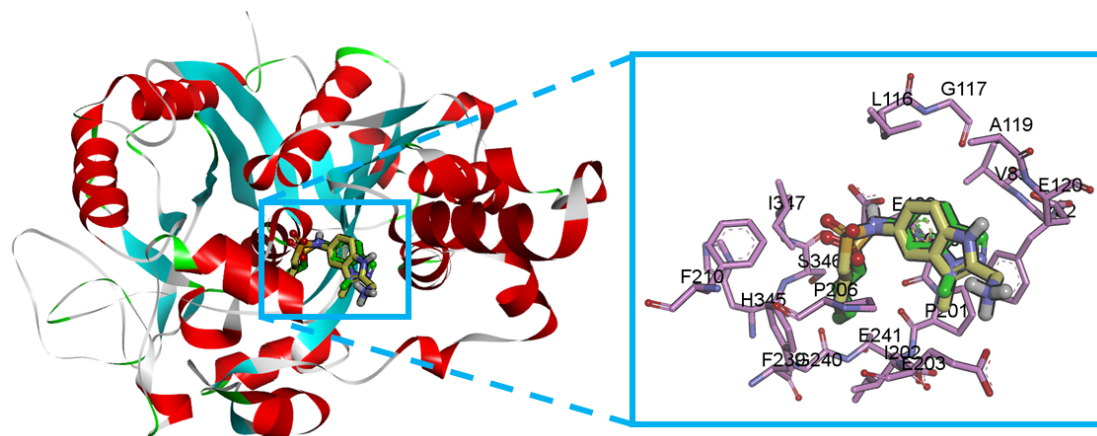

**Figure S2. Related to Tables 1 and 2.** Synthetic route to A) and B) transposed indoles and C) transposed indazoles. A) To access the 3-methyl-*IH*-indole analogs, we first synthesized the *N*-Boc-2'-bromo-5'-aminoacetophenone in two steps. (Bartoli et al., 2009) The *N*-Boc-protected ethyl 3-methyl-*IH*-indole-2-carboxylate **A1** was obtained by a ligand-free copper-catalyzed cascade reaction. (Cai et al., 2009) The 5-amino intermediate **A2** was provided upon TFA-mediated cleavage of the Boc group. The resulting amine **A2** was sulfonylated with *n*-butylsulfonyl chloride in presence of 2,6-lutidine to obtain *n*-butyl sulfonamide indole **5**. Saponification of the ethyl ester proceeded smoothly using LiOH in 1,4-dioxane with mild heating. The activation of acid **6** as a pentafluorophenyl (Pfp) ester **A3** and the subsequent treatment of the ester with aqueous ammonia provided the primary amide **8**. Direct routes from an ethyl ester to the parent amide reported in the literature (Csomós et al., 2007; Zhou et al., 2015) failed in our hands to provide **8** in satisfactory yield and reasonable reaction times. Initial attempts to reduce amide **8** with a variety of reducing agents (e.g., LiAlH<sub>4</sub>, BH<sub>3</sub>•THF) failed to provide the desired amine **11**. (Csomós et al., 2006; Zhou et al., 2015) Several publications reported successful reductions of indole amides via the intermediate nitrile. (El-Fehail Ali et al., 1999; Steinman, 1978) Accordingly, we dehydrated the amide **8** with POCl<sub>3</sub> to provide nitrile **9**. While reductions of 2-nitrile indoles in the literature implemented LiAlH<sub>4</sub>, we were only able to detect the imine intermediate as the major product. Instead, NaBH<sub>4</sub> in the presence of nickel(II) chloride was able to reduce the nitrile to the desired amine **11**. (Caddick et al., 2000; Khurana and Kukreja, 2002) B) The parent 3-methyl-*IH*-indole **4**, with a hydrogen 2-substituent, was synthesized by a Mizoroki-Heck reaction starting from commercially available 2-bromo-4-nitroaniline and allyl bromide. (Hennequin et al., 2003) C) Synthetic route to transposed indazoles. The nitro group in each starting indazole was reduced to the amine of type C1 via Pd-catalyzed hydrogenation or with tin(II) chloride in methanol with mild heating. The resulting 3-substituted 5-amino-*IH*-indazole was sulfonylated using the appropriate sulfonyl chloride in dry pyridine to afford the target compounds. (a) Pd/C, H<sub>2</sub>, EtOH, (b) RSO<sub>2</sub>Cl, pyridine, 0 °C to rt. (c) SnCl<sub>2</sub>•2H<sub>2</sub>O, EtOH, reflux (d) RSO<sub>2</sub>Cl, pyridine, 0 °C to rt.

**A)**

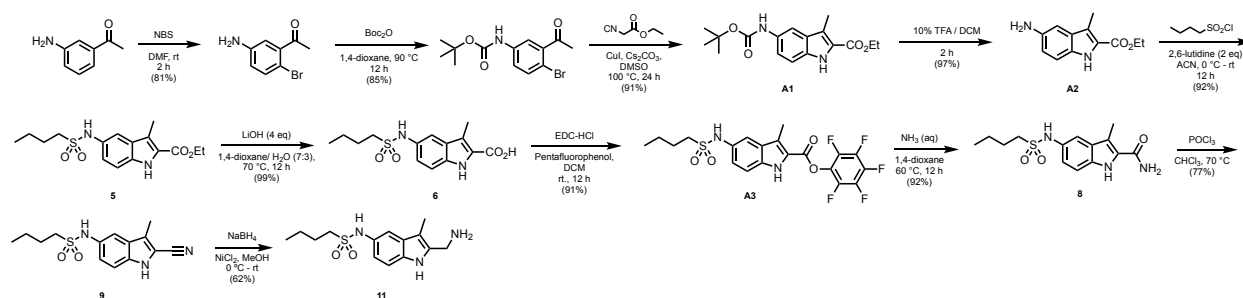

**B)**

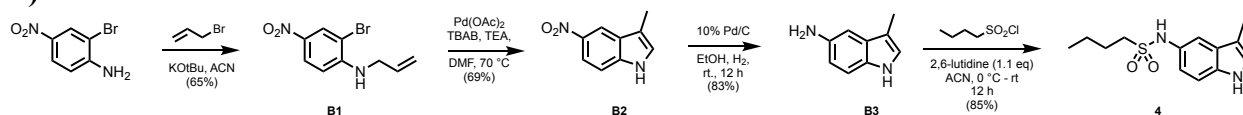

**C)**

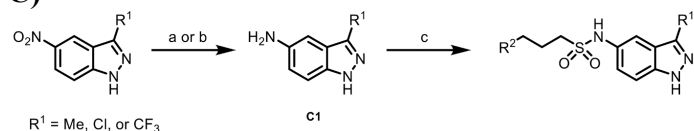

**Figure S3. Related to Tables 1 and 2.** The kill kinetics of indoles A) **9** and B) **10**, and C) JSF-3285 at 10x MIC versus *M. tuberculosis* H37Rv and reduction of intracellular *M. tuberculosis* mc<sup>2</sup>6206 infection in J774.1 cells by indoles D) **9** and E) **10** and F) JSF-3285 with G) INH and H) RIF as controls. For kill kinetics, the comparisons include INH and DMSO in all cases, and in some cases, DG167 or the select analog with DG167 or INH (each also at 10x MIC). The samples were drawn from the same culture flasks (initial volume of 40 mL each) over the duration of the experiment and plated in three technical replicates to count CFUs. The *M. tuberculosis* infected cells were exposed to compounds at set concentrations for 72 h and the residual cell viability (%) was measured by luminescence assay. Each IC<sub>50</sub> result was expressed as the mean ± standard deviation of triplicates from one of two independent experiments. All data were plotted using GraphPad Prism 8.1.2 with errors bars calculated from the standard deviation from three technical replicates.

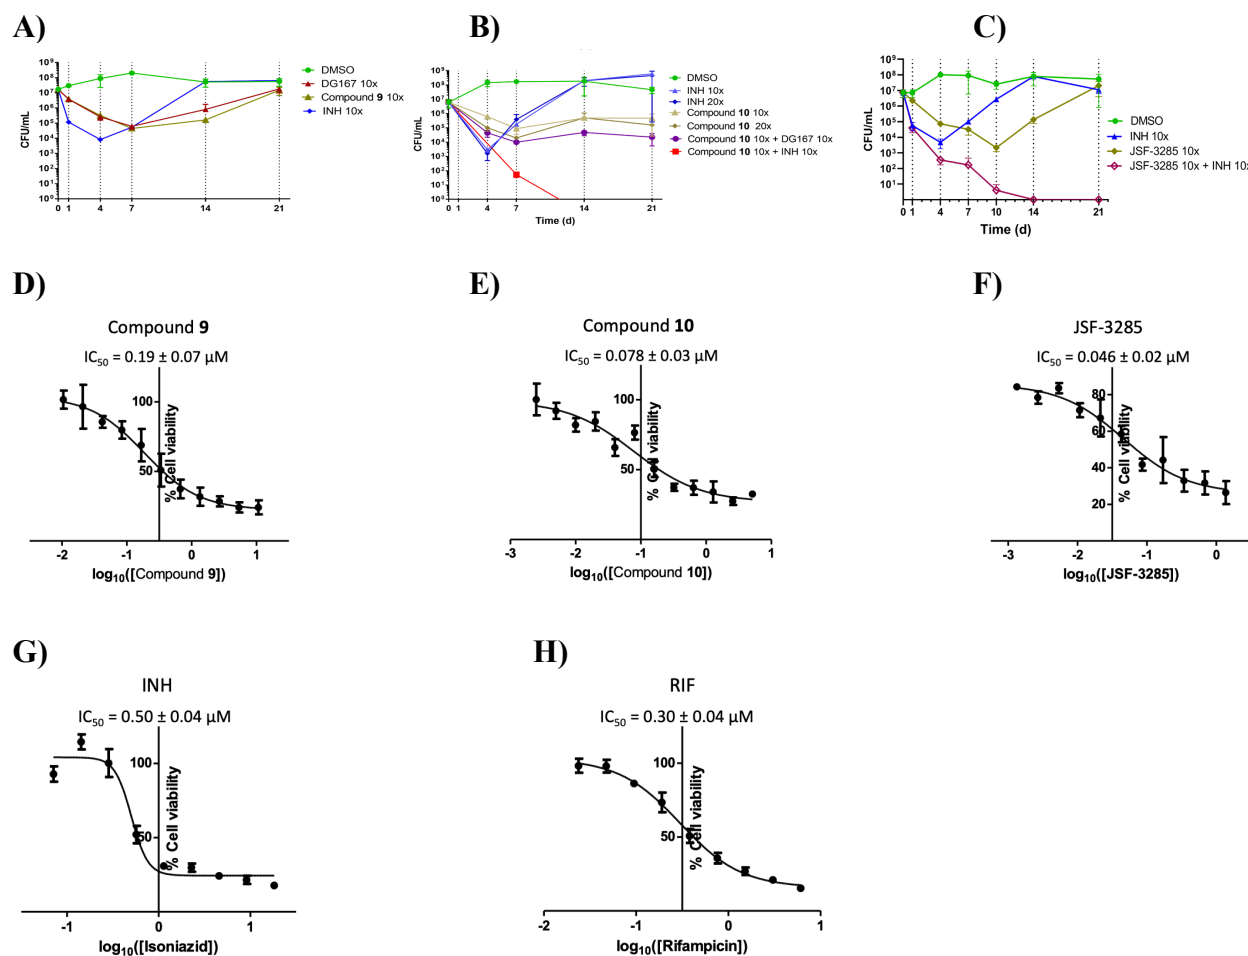

**Figure S4. Related to Figure 2.** Unidentified electron density near the compound **9** binding site. An image of the unidentified electron density found near compound **9** in the KasA substrate binding pocket. KasA residues and **9** are depicted as yellow sticks, water molecules are depicted as red asterisks, the blue mesh represents the  $2F_o-F_c$  map scaled to  $1.0\sigma$ , and the green mesh represents the  $F_o-F_c$  map scaled to  $3.0\sigma$ . Image generated in Coot.(Emsley et al., 2010)

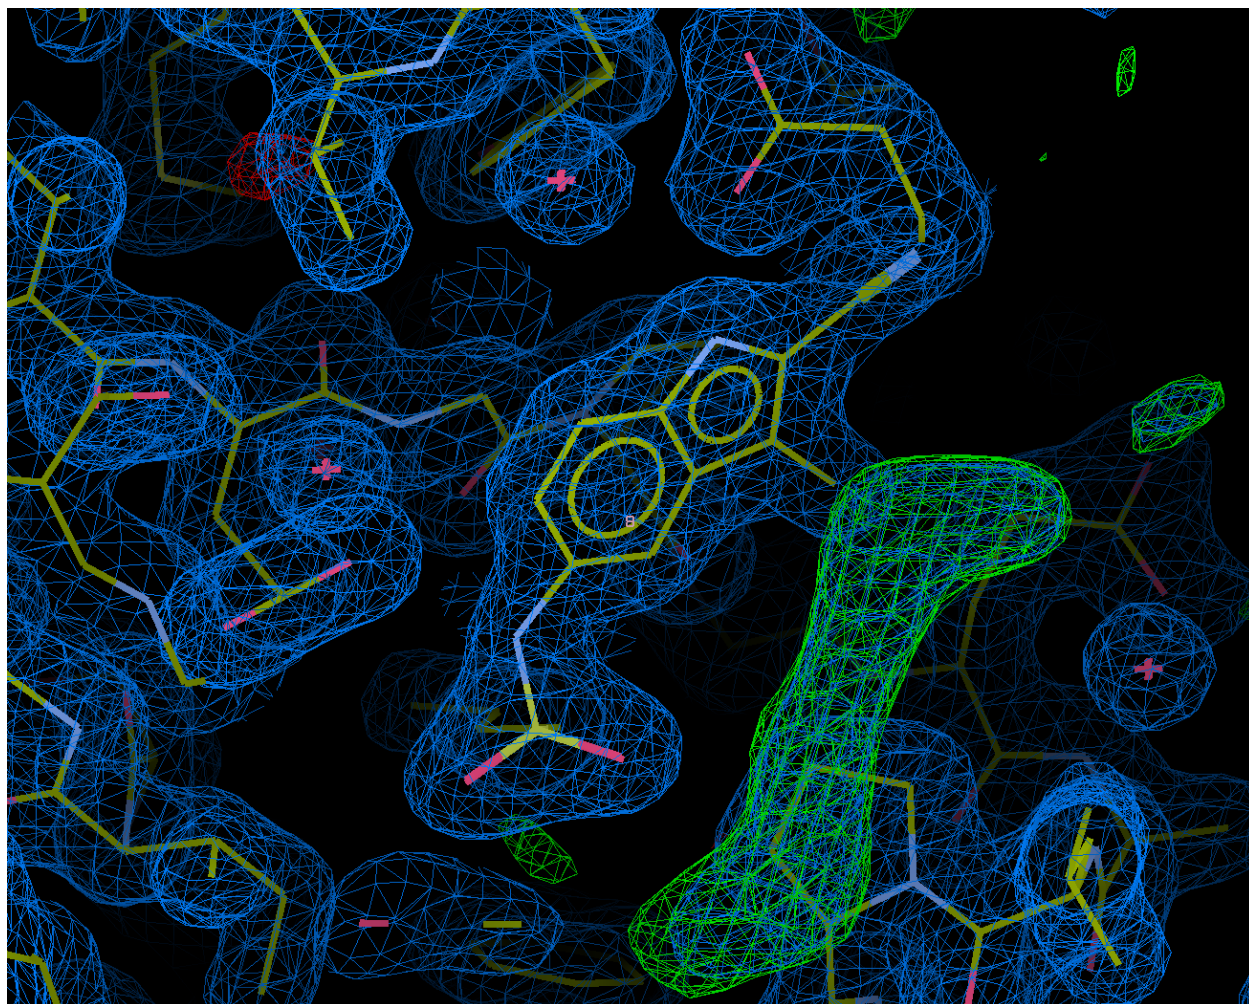

**Figure S5. Related to Figure 2.** Structural comparison of KasA-DG167 and KasA-9/10. A) Two molecules of DG167 (DG167<sub>A</sub> and DG167<sub>B</sub>) bind to KasA (PDB ID 5W2P). B) Schematic representation of DG167<sub>A</sub> interactions. C) Compound **9** modeled into the DG167<sub>B</sub> binding site (a second copy of **9** or **10** for D) was modeled into the DG167<sub>B</sub> site with PyMol Version 1.8.2.3(Delano, 2002) using DG167<sub>B</sub> as a scaffold to which the requisite modifications were made) revealed a steric clash with the KasA surface highlighted by the dashed red box. D) Compound **10** modeled into the DG167<sub>B</sub> binding site revealed a steric clash with the KasA surface highlighted by the dashed red box. E) Structural alignment of KasA-**9** and KasA-**10** using the KasA C $\alpha$  atoms. F) Isolated and rotated view of compounds **9** and **10** from the structural alignment depicted in E). Molecules are labeled consistently throughout the figure. KasA is depicted as either a cyan surface or sticks. DG167<sub>A</sub> is depicted as either green balls-and-sticks or bonds. DG167<sub>B</sub> is depicted as magenta bonds. **9**<sub>clash</sub> is depicted as yellow balls-and-sticks. **10**<sub>clash</sub> is depicted as pink balls-and-sticks. Hydrogen bonds are depicted as dashed lines measured in Å. The blue semicircles with radiating lines represent hydrophobic contacts mediated by KasA residues. The schematic was produced with LIGPLOT.(Wallace et al., 1995)

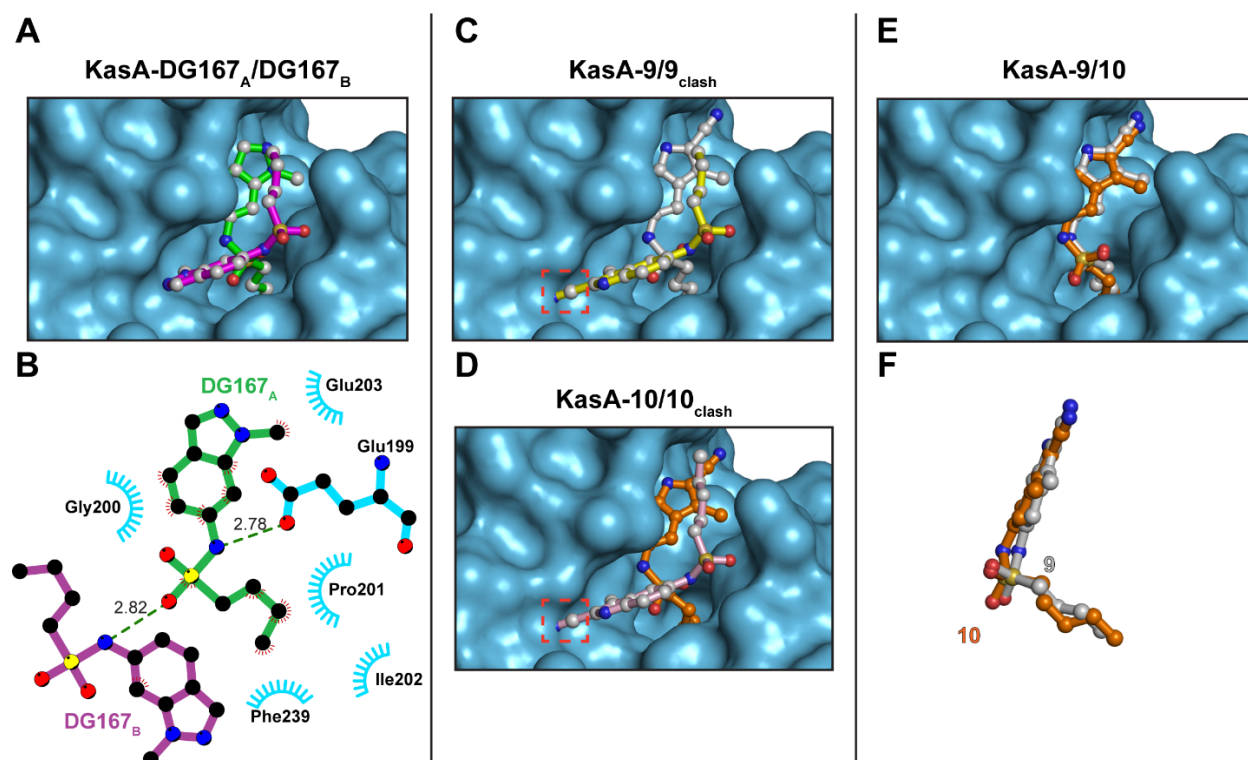

**Figure S6. Related to Tables 1 and 2.** Plot of plasma concentration ( $C_{\text{plasma}}$ ) as a function of time for a single 25 mg/kg oral dose study in mice of A) compound **9**, B) compound **10**, C) DG167, D) compound **5g**, E) compound **12** (JSF-3285), F) compound **13**, G) compound **14**, H) compound **15**, and I) compound **16**. The red dotted line in each graph represents the MIC of each compound.

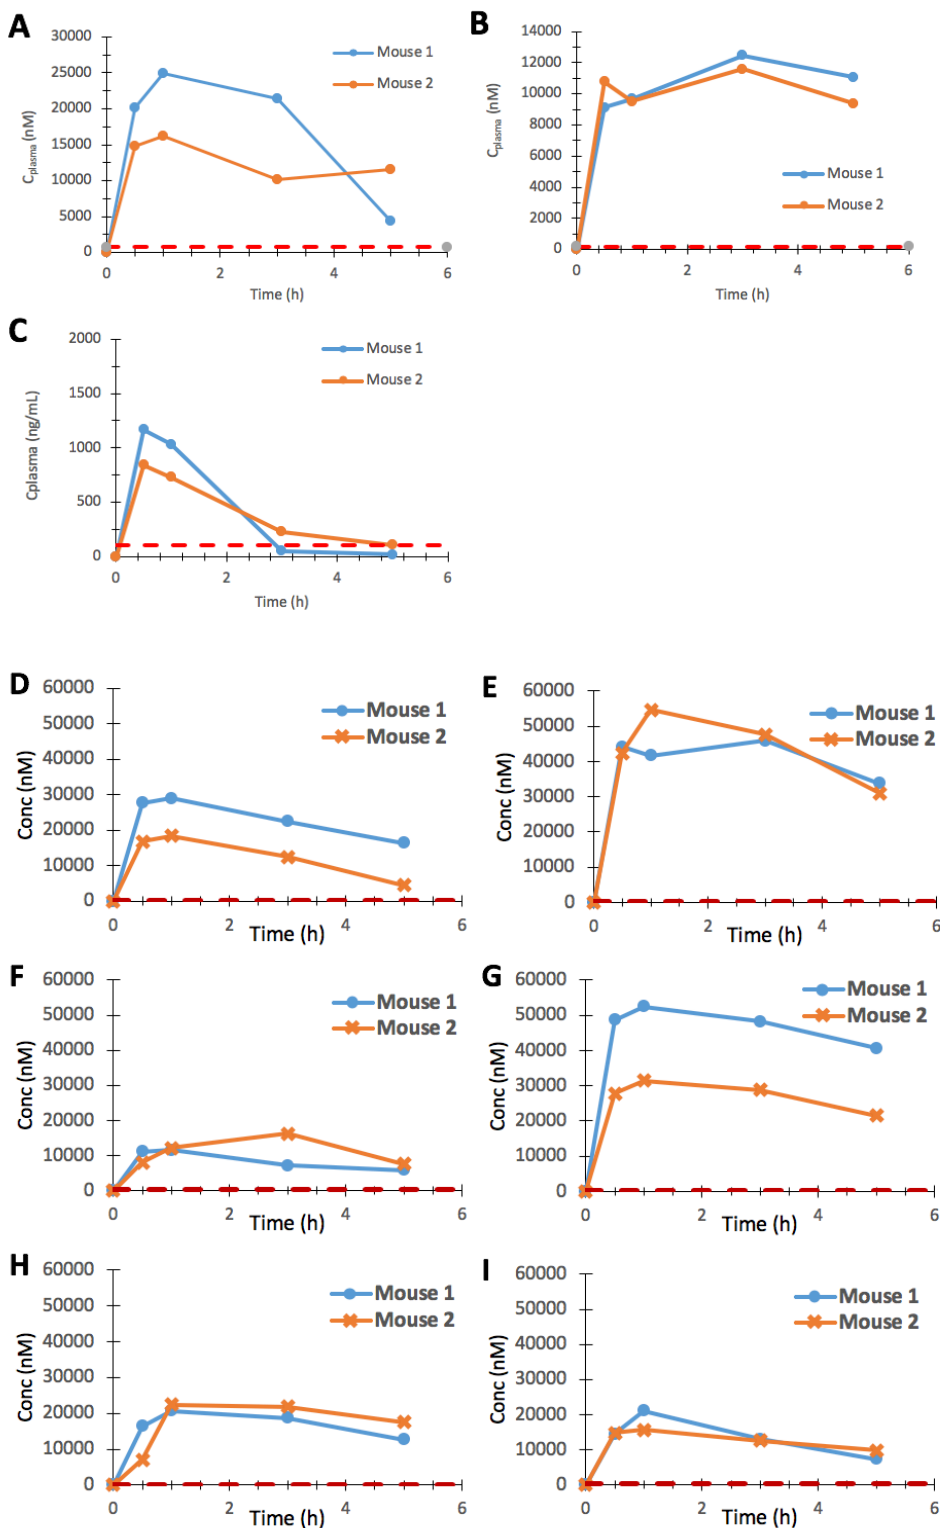

**Figure S7. Related to Table 2.** Effect of JSF-3285 on *M. tuberculosis* mycolic acid biosynthesis using  $^{14}\text{C}$ -acetate labeling of newly synthesized fatty acids (FAMEs) and mycolic acids (MAMEs). A) Normal-phase TLC showing effect of JSF-3285 on *M. tuberculosis* H37Rv. B) Quantification of bands in panel A TLC and two additional replicates. C) Reverse-phase TLC analysis showing effects on FAMEs in select samples from panel A. D) Quantification of bands in panel C TLC and two additional replicates (mean values are depicted). E – H) Normal-phase TLC analysis of MAMEs from JSF-3285 resistant isolates of *M. tuberculosis*: E – strain 8x5 and G – strain 16x16 (Table S3B) with F and H depicting quantification of panels E and G with two additional replicates each, respectively. The TLCs were visualized by phosphorimaging, quantified using ImageQuant Total Lab, and plotted using GraphPad Prism 8.1.2.

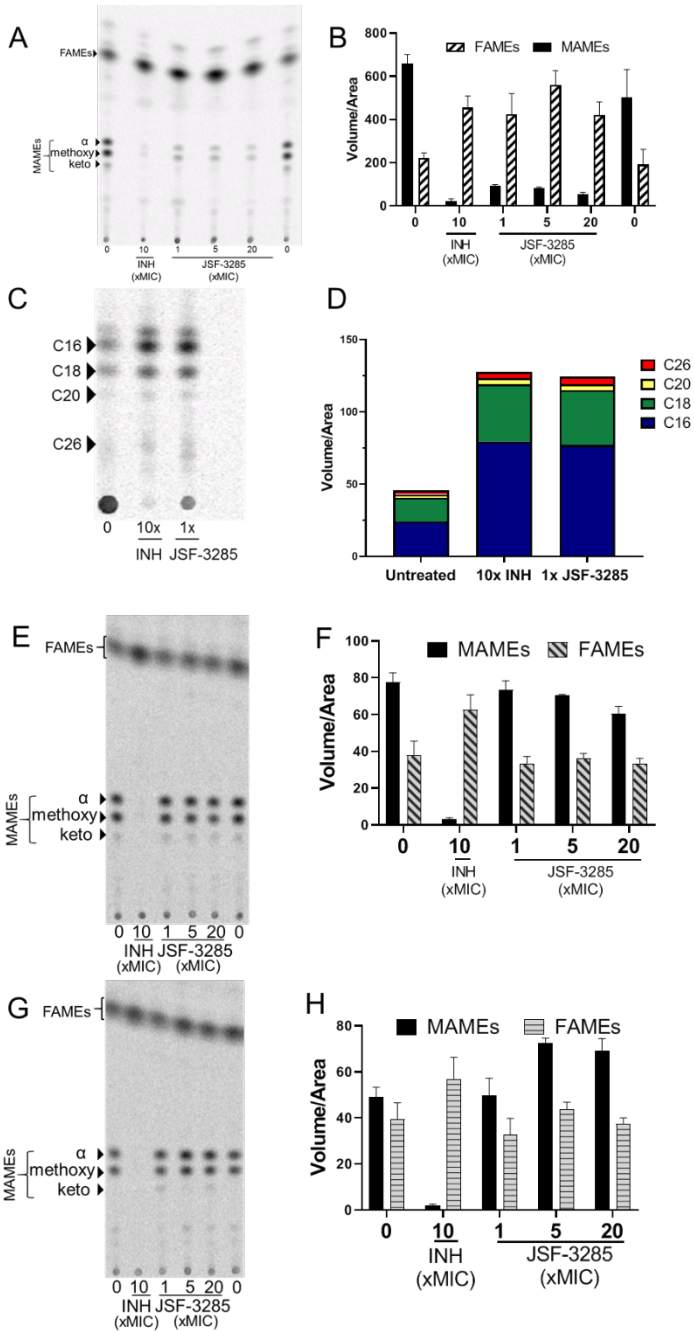



**Table S1. Related to Table 1.** *M. tuberculosis* MIC and Vero cell CC<sub>50</sub> data for additional transposed indole analogs.

| <b>Cmpd</b> | <b>R<sup>1</sup></b> | <b>R<sup>2</sup></b>             | <b>MIC H37Rv<br/>(<math>\mu</math>M)</b> | <b>Vero CC<sub>50</sub><br/>(<math>\mu</math>M)</b> |
|-------------|----------------------|----------------------------------|------------------------------------------|-----------------------------------------------------|
| 1           | CO <sub>2</sub> Et   | NHCO <sub>2</sub> - <i>t</i> -Bu | >100                                     | >160                                                |
| 2           | CO <sub>2</sub> Et   | NH <sub>2</sub>                  | >100                                     | 110                                                 |
| 3           | H                    | NO <sub>2</sub>                  | >100                                     | 140                                                 |
| 6           | CO <sub>2</sub> H    | NHSO <sub>2</sub> - <i>n</i> -Bu | >100                                     | >160                                                |
| 7           | CH <sub>2</sub> OH   | NHSO <sub>2</sub> - <i>n</i> -Bu | >100                                     | >170                                                |
| 12          | CH <sub>2</sub> NHAc | NHSO <sub>2</sub> - <i>n</i> -Bu | >100                                     | >150                                                |

**Table S2. Related to Tables 1 and 2.** Activity of A) select transposed indoles (tabulated MIC values are in  $\mu\text{M}$ ) versus clinical drug-resistant *M. tuberculosis* strains, (Vincent et al., 2012; Wilson et al., 2013), B) JSF-3285 versus select ESKAPE bacteria, and C) JSF-3285 versus clinical drug-resistant *M. tuberculosis* strains.

A)

| <b>Cmpd</b> | <b>H37Rv</b> | <b>TDR31<sup>a</sup></b> | <b>TDR91<sup>b</sup></b> | <b>TDR116<sup>c</sup></b> |
|-------------|--------------|--------------------------|--------------------------|---------------------------|
| 9           | 0.78         | 0.39                     | 0.39                     | 0.78                      |
| 10          | 0.20         | 0.20                     | 0.10                     | 0.20                      |
| INH         | 0.40         | >12                      | >12                      | >12                       |

<sup>a</sup>Resistant to INH, RIF, ethambutol, kanamycin, streptomycin, and capreomycin

<sup>b</sup>Resistant to INH, RIF, and ethambutol

<sup>c</sup>Resistant to INH, ethambutol, *p*-aminosalicylic acid

B)

| <b>Organism</b>      | <b>Strain</b> | <b>JSF-3285<br/>MIC (<math>\mu\text{M}</math>)</b> |
|----------------------|---------------|----------------------------------------------------|
| <i>A. baumannii</i>  | ATCC 19606    | >50                                                |
| <i>E. cloacae</i>    | ATCC 13047    | >50                                                |
| <i>E. faecium</i>    | NCTC 7171     | >50                                                |
| <i>K. pneumoniae</i> | BAA 2146      | >50                                                |
| <i>P. aeruginosa</i> | HER 1018      | >50                                                |
| <i>S. aureus</i>     | ATCC 43300    | >50                                                |

C)

| <b>Strain</b> | <b>Geographic Isolation</b> | <b>Resistance profile</b> | <b>JSF-3285<br/>MIC (<math>\mu\text{M}</math>)</b> |
|---------------|-----------------------------|---------------------------|----------------------------------------------------|
| H37Rv         | Laboratory strain           | Pan-susceptible           | 0.39                                               |
| TDR29         | Azerbaijan                  | Pan-susceptible           | 0.195                                              |
| TDR1          | Bangladesh                  | Pan-susceptible           | 0.195                                              |
| TDR126        | Brazil                      | Pan-susceptible           | 0.39                                               |
| TDR138        | Germany                     | Pan-susceptible           | 0.195                                              |
| TDR173        | Philippines                 | Pan-susceptible           | 0.39                                               |
| TDR91         | South Korea                 | Pan-susceptible           | 0.0975                                             |
| TDR128        | Brazil                      | EMB                       | 0.195                                              |
| TDR156        | Peru                        | EMB                       | 0.39                                               |
| TDR92         | South Korea                 | EMB                       | 0.39                                               |

|        |             |                   |         |
|--------|-------------|-------------------|---------|
| TDR143 | Germany     | SM                | 0.0975  |
| TDR146 | Nepal       | SM                | 0.195   |
| TDR74  | Rwanda      | INH, RIF          | 0.39    |
| TDR150 | Rwanda      | INH, RIF          | 0.39    |
| TDR106 | South Korea | INH, RIF          | 0.0975  |
| TDR42  | Bangladesh  | INH, EMB          | 0.195   |
| TDR132 | Brazil      | INH, EMB          | 0.78    |
| TDR195 | Morocco     | INH, EMB          | 0.39    |
| TDR104 | South Korea | INH, EMB          | 0.195   |
| TDR109 | South Korea | INH, SM           | 0.39    |
| TDR73  | Peru        | INH, RIF, EMB     | 0.0975  |
| TDR21  | RD Congo    | INH, RIF, EMB     | 0.195   |
| TDR101 | Rwanda      | INH, RIF, EMB     | 0.78    |
| TDR114 | Rwanda      | INH, RIF, EMB     | 0.0975  |
| TDR162 | Rwanda      | INH, RIF, EMB     | 0.0975  |
| TDR99  | South Korea | INH, RIF, EMB     | 0.0975  |
| TDR26  | Abkhazia    | INH, RIF, SM      | 0.195   |
| TDR6   | Bangladesh  | INH, RIF, SM      | 0.195   |
| TDR36  | Bangladesh  | INH, RIF, SM      | 0.0975  |
| TDR37  | Bangladesh  | INH, EMB, SM      | 0.0975  |
| TDR93  | South Korea | INH, EMB, SM      | 0.195   |
| TDR105 | South Korea | INH, EMB, SM      | 0.39    |
| TDR120 | South Korea | INH, EMB, SM      | 0.195   |
| TDR123 | South Korea | INH, EMB, SM      | 0.39    |
| TDR19  | Azerbaijan  | INH, RIF, EMB, SM | 0.195   |
| TDR7   | Bangladesh  | INH, RIF, EMB, SM | 0.195   |
| TDR32  | Bangladesh  | INH, RIF, EMB, SM | <0.0975 |
| TDR133 | Brazil      | INH, RIF, EMB, SM | 0.0975  |
| TDR50  | Burundi     | INH, RIF, EMB, SM | 0.195   |
| TDR58  | Burundi     | INH, RIF, EMB, SM | 0.195   |
| TDR192 | Guinea      | INH, RIF, EMB, SM | 0.195   |
| TDR196 | India       | INH, RIF, EMB, SM | 0.0975  |
| TDR31  | Kazakhstan  | INH, RIF, EMB, SM | 0.195   |
| TDR191 | Peru        | INH, RIF, EMB, SM | 0.195   |
| TDR216 | Peru        | INH, RIF, EMB, SM | 0.195   |
| TDR67  | Rwanda      | INH, RIF, EMB, SM | 0.0975  |
| TDR72  | Rwanda      | INH, RIF, EMB, SM | 0.0975  |
| TDR87  | South Korea | INH, RIF, EMB, SM | 0.195   |
| TDR116 | South Korea | INH, RIF, EMB, SM | 0.0975  |
| TDR124 | South Korea | INH, RIF, EMB, SM | 0.78    |

---

**Table S3. Related to Tables 1 and 2.** Activity of A) compounds **9** and **10** and JSF-3285 versus DG167-resistant *M. tuberculosis* mutants and B) JSF-3285 versus JSF-3285 spontaneous resistant *M. tuberculosis* mutants. Tabulated MIC values are in  $\mu\text{M}$ .

A)

| Cmpd     | H37Rv | DRM167<br>16x3 | DRM167<br>8x3 | DRM167<br>16x6 | DRM167<br>8x2 | DRM167<br>32x11 | DRM167<br>32x2 |
|----------|-------|----------------|---------------|----------------|---------------|-----------------|----------------|
|          | WT    | V123A          | I145T         | I122S          | A119T         | G240S           | P206T          |
| DG167    | 0.39  | 1.6            | 6.2           | 50             | 50            | 100             | >100           |
| 9        | 0.78  | 100            | >100          | >100           | >100          | >100            | >100           |
| 10       | 0.20  | >100           | >100          | >100           | >100          | >100            | >100           |
| JSF-3285 | 0.39  | 25             | >100          | >100           | >100          | >100            | >100           |
| INH      | 0.19  | 0.19           | 0.19          | 0.19           | 0.19          | 0.19            | 0.19           |

B)

| Strain         | <i>kasA</i> -SNP <sup>a</sup> | KasA <sup>b</sup> | MIC ( $\mu\text{M}$ ) |          |      |
|----------------|-------------------------------|-------------------|-----------------------|----------|------|
|                |                               |                   | DG 167                | JSF-3825 | INH  |
| H37Rv          | none                          | none              | 0.39                  | 0.39     | 0.31 |
| DRM 3285 4x1   | gAa-gCa                       | E199A             | >100                  | >100     | 0.63 |
| DRM 3285 4x2   | gAa-gCa                       | E199A             | >100                  | >100     | 0.31 |
| DRM 3285 8x3   | Atg-Gtg                       | M277V             | >100                  | >100     | 0.16 |
| DRM 3285 8x4   | cCc-cTc                       | P147L             | 100                   | 50       | 1.25 |
| DRM 3285 8x5   | gGa-gCa                       | G200A             | >100                  | >100     | 0.16 |
| DRM 3285 8x6   | cCc-cTc                       | P147L             | >100                  | 100      | 0.31 |
| DRM 3285 8x7   | cCc-cTc                       | P147L             | >100                  | 50       | 0.31 |
| DRM 3285 8x8   | cCc-cTc                       | P147L             | 50                    | 12.5     | 0.31 |
| DRM 3285 16x9  | gTg-gCg                       | V137A             | >100                  | >100     | 0.16 |
| DRM 3285 16x10 | Atg-Gtg                       | M277V             | nd                    | nd       | nd   |
| DRM 3285 16x11 | cCc-cTc                       | P147L             | 100                   | 100      | 0.31 |
| DRM 3285 16x12 | Gtt-Ctt                       | V142L             | 100                   | 100      | 0.31 |
| DRM 3285 16x13 | aTc-aAc                       | I145N             | >100                  | >100     | nd   |
| DRM 3285 16x14 | Atg-Gtg                       | M277V             | >100                  | >100     | 0.31 |
| DRM 3285 16x15 | Atg-Gtg                       | M277V             | >100                  | >100     | 0.31 |
| DRM 3285 16x16 | cTg-cCg                       | L205P             | >100                  | >100     | 0.31 |

<sup>a</sup> Capitalized letter in the codon shows nucleotide change

<sup>b</sup> Row indicates amino acid substitution corresponding to *kasA*-SNPs

nd = Not Determined

**Table S4. Related to Figures 2 and 4.** Data collection and refinement statistics for the X-ray crystal structures of KasA with bound A) compound **9**, compound **10**, or JSF-3285.

|                                           | KasA- <b>9</b>                | KasA-JSF3285                  | KasA- <b>10</b>               |
|-------------------------------------------|-------------------------------|-------------------------------|-------------------------------|
| <b>PDB ID</b>                             | 6P9K                          | 6P9L                          | 6P9M                          |
| <b>Data collection</b>                    |                               |                               |                               |
| Space group                               | P3 <sub>1</sub> 21            | P3 <sub>1</sub> 21            | P3 <sub>1</sub> 21            |
| Cell dimensions                           |                               |                               |                               |
| a, b, c (Å)                               | 77.51, 77.51, 145.17          | 77.80, 77.80, 146.37          | 77.71, 77.71, 146.44          |
| $\alpha$ , $\beta$ , $\gamma$ (°)         | 90.0, 90.0, 120.0             | 90.0, 90.0, 120.0             | 90.0, 90.0, 120.0             |
| Resolution (Å)                            | 50.00-1.70 (1.75-1.70)        | 50.00-2.30 (2.34-2.30)        | 50.00-2.25 (2.29-2.25)        |
| Wavelength (Å)                            | 0.88557                       | 0.97946                       | 0.97946                       |
| Completeness (%)                          | 99.9 (100.0)                  | 99.7 (97.1)                   | 99.0 (97.0)                   |
| R <sub>sym</sub> (%)                      | 6.4 (54.6)                    | 8.8 (57.1)                    | 4.8 (69.8)                    |
| CC <sup>1/2</sup>                         | 0.999 (0.932)                 | 0.997 (0.928)                 | 0.999 (0.953)                 |
| Average I / $\sigma$ I                    | 41.2 (3.2)                    | 46.8 (4.6)                    | 38.1 (2.4)                    |
| Redundancy                                | 9.9                           | 9.5                           | 9.9                           |
| Total reflections                         | 553,090                       | 219,910                       | 243,851                       |
| Unique reflections                        | 55,980                        | 23,255                        | 24,547                        |
|                                           |                               |                               |                               |
| <b>Refinement</b>                         |                               |                               |                               |
| R <sub>work</sub> / R <sub>free</sub> (%) | 14.43 (16.41) / 16.93 (19.92) | 17.12 (22.69) / 20.43 (29.35) | 19.68 (39.57) / 23.15 (41.79) |
|                                           |                               |                               |                               |
| <b>Number of atoms</b>                    |                               |                               |                               |
| All atoms                                 | 3419                          | 3165                          | 3189                          |
| Protein                                   | 3085                          | 3042                          | 3042                          |
| Ligand                                    | 20                            | 19                            | 21                            |
| Glycerol                                  | 6                             | 6                             | 12                            |
| 2-propanol                                | 20                            | 20                            | 12                            |
| Ions                                      | 1                             | 1                             | 1                             |
| Water                                     | 287                           | 77                            | 101                           |
| <b>Average B-factor (Å<sup>2</sup>)</b>   |                               |                               |                               |
| All atoms                                 | 35.57                         | 63.17                         | 67.54                         |
| Protein                                   | 34.66                         | 63.19                         | 67.78                         |
| Ligands                                   | 45.34                         | 42.40                         | 74.12                         |
| Water                                     | 43.77                         | 56.68                         | 57.38                         |
| <b>R.m.s. deviations</b>                  |                               |                               |                               |
| Bond lengths (Å)                          | 0.009                         | 0.003                         | 0.002                         |
| Bond angles (°)                           | 1.018                         | 0.555                         | 0.480                         |
| <b>Ramachandran statistics</b>            |                               |                               |                               |
| Favored (%)                               | 97.33                         | 96.84                         | 97.09                         |
| Allowed (%)                               | 2.43                          | 2.92                          | 2.57                          |
| Outliers (%)                              | 0.24                          | 0.24                          | 0.24                          |

Data collection and refinement statistics.  $R_{\text{sym}} = \sum_h \sum_i | I_i(h) - \langle I(h) \rangle | / \sum_h \sum_i I_i(h)$ , where  $I_i(h)$  is the  $i^{\text{th}}$  measurement of  $h$  and  $\langle I(h) \rangle$  is the mean of all measurements of  $I(h)$  for reflection  $h$ .  $R_{\text{work}} = \sum ||F_o| - |F_c|| / \sum |F_o|$ , calculated with a working set of reflections.  $R_{\text{free}}$  is  $R_{\text{work}}$  calculated with only the test set of reflections. Data for the highest resolution shell are given in parentheses. The structures were determined using single crystals.

**Table S5. Related to Table 1.** Mouse PK profiling of select indole compounds.

|                                                         | <b>Compound<br/>9</b> | <b>Compound<br/>10</b> | <b>DG167</b> |
|---------------------------------------------------------|-----------------------|------------------------|--------------|
| Plasma<br>AUC <sub>0-5h</sub> <sup>a</sup><br>(h*ng/mL) | 21511                 | 15624                  | 1965         |
| C <sub>max</sub> <sup>a</sup><br>(ng/mL)                | 7260                  | 3800                   | 1030         |
| MIC<br>(ng/mL)                                          | 230                   | 61                     | 100          |
| Plasma<br>AUC <sub>0-5h</sub><br>/MIC <sup>a</sup>      | 93                    | 260                    | 20           |
| C <sub>max</sub> /MIC <sup>a</sup>                      | 31                    | 62                     | 10           |
| T>MIC <sup>a</sup><br>(h)                               | ≥5                    | ≥5                     | 3 – 5        |
| C <sub>lung</sub> /C <sub>plasma</sub><br>at 5 h        | 2.54                  | 0.96                   | nd           |
| t <sub>1/2</sub> <sup>b</sup><br>(h)                    | 1.03                  | 1.30                   | 0.54         |
| Clearance <sup>b</sup><br>(mL/h*kg)                     | 980.9                 | 682.4                  | 2855.1       |
| V <sub>d</sub> (L/kg) <sup>b</sup>                      | 1.45                  | 1.28                   | 2.21         |

<sup>a</sup> Average of two mice following administration of a single 25 mg/kg po dose<sup>b</sup> Average of three mice following administration of a single 5 mg/kg iv dose  
nd = not determined

**Table S6. Related to Tables 1 and 2.** A) Plasma protein binding (PPB) and plasma stability and B) cytochrome P450 inhibition for compounds **9**, **10**, and **JSF-3285**.

A)

| <b>Cmpd</b> | <b>Human PPB (%)</b> | <b>Human plasma Stability @ 5 h (%)</b> | <b>Mouse PPB (%)</b> | <b>Mouse plasma Stability @ 5 h (%)</b> |
|-------------|----------------------|-----------------------------------------|----------------------|-----------------------------------------|
| 9           | 97.4                 | 93.5                                    | 96.1                 | 95.5                                    |
| 10          | 99.4                 | >99.9                                   | 98.0                 | 87.0                                    |
| JSF-3285    | 77.4                 | 83.0                                    | 62.8                 | >99.9                                   |

B)

| <b>Cmpd</b> | <b>Cytochrome P450 1A2 Inhibition IC<sub>50</sub> (μM)</b> | <b>Cytochrome P450 2C9 Inhibition IC<sub>50</sub> (μM)</b> | <b>Cytochrome P450 2C19 Inhibition IC<sub>50</sub> (μM)</b> | <b>Cytochrome P450 2D6 Inhibition IC<sub>50</sub> (μM)</b> | <b>Cytochrome P450 3A4 Inhibition IC<sub>50</sub> (μM)</b> |
|-------------|------------------------------------------------------------|------------------------------------------------------------|-------------------------------------------------------------|------------------------------------------------------------|------------------------------------------------------------|
| 9           | 4.90                                                       | 5.08                                                       | 1.72                                                        | 3.56                                                       | 7.46                                                       |
| 10          | 5.00                                                       | 1.94                                                       | 0.542                                                       | 1.47                                                       | 1.47                                                       |
| JSF-3285    | >50                                                        | >50                                                        | >50                                                         | >50                                                        | >50                                                        |



**Table S7. Related to Tables 1 and 2.** Dose escalation and tolerability data for compounds A) **9**, B) **10**, and C) JSF-3285.

A)

| <b>Dose (mg/kg)</b> | <b>Average AUC<sub>0-24h</sub> (h*ng/mL)</b> | <b>Dose corrected AUC<sub>0-24h</sub> (AUC<sub>0-24h</sub> /Dose)</b> | <b>Theoretical Proportionality</b> | <b>Dose Proportionality</b> |
|---------------------|----------------------------------------------|-----------------------------------------------------------------------|------------------------------------|-----------------------------|
| 25 <sup>a</sup>     | 14494.5                                      | 579.8                                                                 | 1.0                                | 1.00                        |
| 50                  | 54977.1                                      | 1099.5                                                                | 2.0                                | 3.79                        |
| 100                 | 99454.2                                      | 994.5                                                                 | 4.0                                | 6.86                        |
| 250                 | 335441.7                                     | 1341.8                                                                | 10.0                               | 23.14                       |
| 500                 | 395749.2                                     | 791.5                                                                 | 20.0                               | 27.30                       |

<sup>a</sup> 25 mg/kg data from 8-h PK study

B)

| <b>Dose (mg/kg)</b> | <b>Average AUC<sub>0-24h</sub> (h*ng/mL)</b> | <b>Dose corrected AUC<sub>0-24h</sub> (AUC<sub>0-24h</sub> /Dose)</b> | <b>Theoretical Proportionality</b> | <b>Dose Proportionality</b> |
|---------------------|----------------------------------------------|-----------------------------------------------------------------------|------------------------------------|-----------------------------|
| 25 <sup>a</sup>     | 16739.3                                      | 669.6                                                                 | 1.0                                | 1.0                         |
| 50                  | 59569.9                                      | 1191.4                                                                | 2.0                                | 3.6                         |
| 100                 | 109779.8                                     | 1097.8                                                                | 4.0                                | 6.6                         |
| 250                 | 305004.3                                     | 1220.0                                                                | 10.0                               | 18.2                        |
| 500                 | 486227.0                                     | 972.5                                                                 | 20.0                               | 29.0                        |

<sup>a</sup> 25 mg/kg data from 8-h PK study

C)

| <b>Dose (mg/kg)</b> | <b>Average AUC<sub>0-24h</sub> (h*ng/mL)</b> | <b>Dose corrected AUC<sub>0-24h</sub> (AUC<sub>0-24h</sub> /Dose)</b> | <b>Theoretical Proportionality</b> | <b>Dose Proportionality</b> |
|---------------------|----------------------------------------------|-----------------------------------------------------------------------|------------------------------------|-----------------------------|
| 25 <sup>a</sup>     | 89415                                        | 3577                                                                  | 1                                  | 1.00                        |
| 50                  | 161453                                       | 3229                                                                  | 2                                  | 1.81                        |
| 150                 | 463752                                       | 3092                                                                  | 6                                  | 5.19                        |
| 300                 | 921700                                       | 3072                                                                  | 12                                 | 10.31                       |

<sup>a</sup> 25 mg/kg data from 8-h PK study
